# Supplementary material
Source: PubMed Central journal article supplement (PMC3932663)

## **Rotenone induces neurotoxicity through Rac1-dependent activation of NADPH oxidase in SHSY-5Y cells**

Rituraj Pal<sup>a</sup>, Tanner O. Monroe<sup>a</sup>, Michela Palmieri<sup>b</sup>, Marco Sardiello<sup>b</sup>, George G. Rodney<sup>a</sup>

### **Supplementary Figure 1**

Dose and time-dependent effects of rotenone on oxidation of p47-roGFP in SHSY-5Y cells. Rotenone did not show an alteration in the oxidation of p47-roGFP below 300 nM for 24 h treatment. Rotenone treatment with 300 nM for 24 h or 500 nM for 12 h showed similar level of oxidation of p47-roGFP. Rotenone treatment with 500 nM for 24 h resulted in further oxidation of p47-roGFP. There was no significant difference in oxidation of p47-roGFP between 24 h and 48 h rotenone treatment (500 nM). \* $p < 0.05$  and \*\* $p < 0.01$ .

### **Supplementary Figure 2**

Fluorescent images of mitochondrial-ROS measurement in SHSY-5Y cells. Both, rotenone (500 nM) and antimycin-A (5  $\mu$ M) increases fluorescence intensity of mitoSOX compared to untreated cells. Mitochondrial-ROS generation is significantly higher in Antimycin-A treated cells compared to rotenone treated cells.

# Supplementary Figure 1

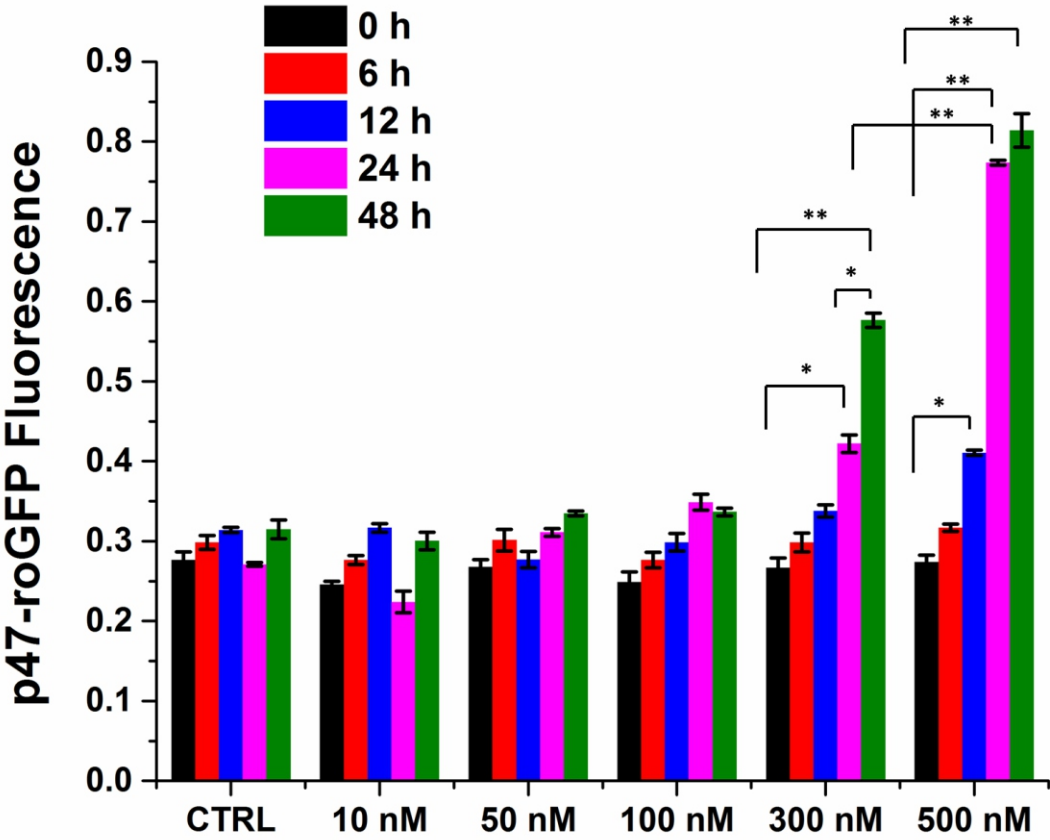

## Supplementary Figure 2

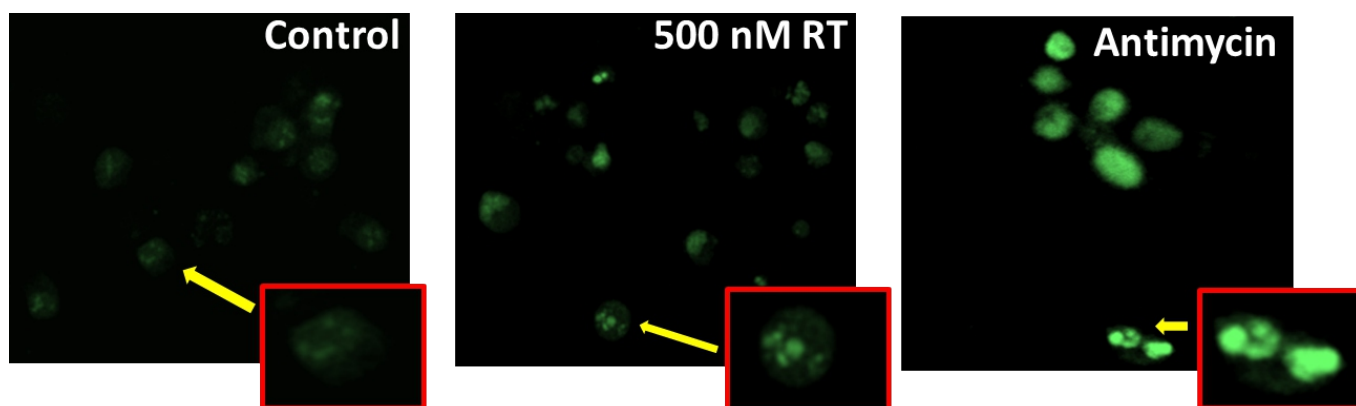

Supplement: NIHMS552231-supplement-01.pdf [file NIHMS552231-supplement-01.pdf]
